# Supplementary material
Source: Springer Nature journal article supplement (https://www.springermedizin.de/resource/supplementary/12958_2010_822_MOESM3_ESM.pdf/9568928)

**(A)**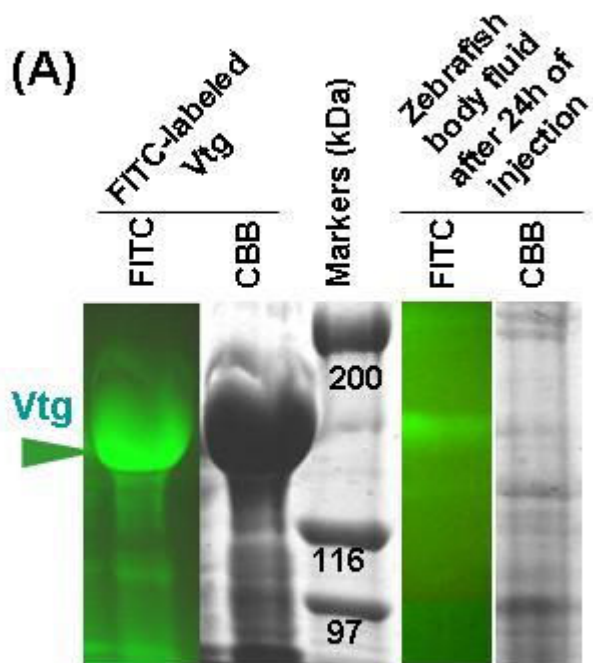**B**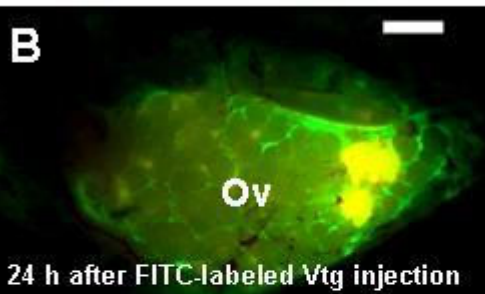**C**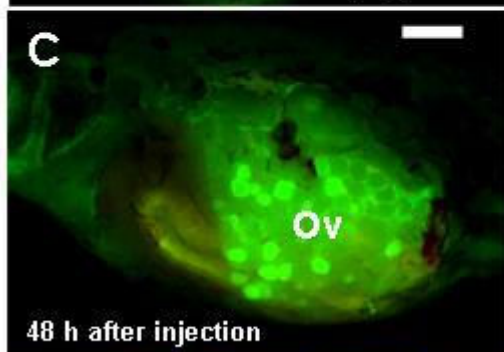**D**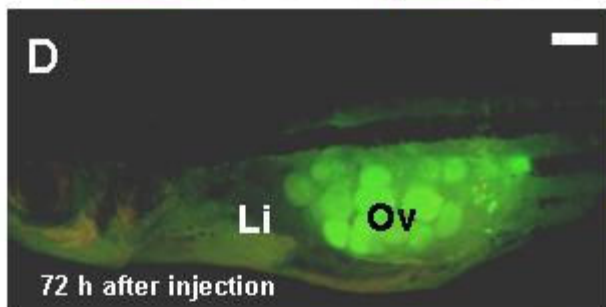**E**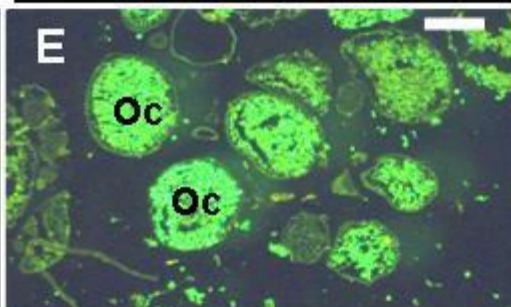**F**

72 h after injection of purified FITC-labeled Vtg

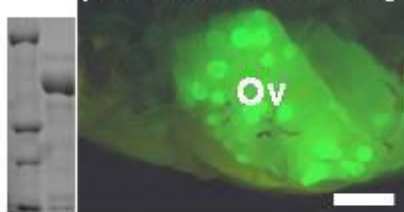**G**

FITC-labeled male lymph proteins

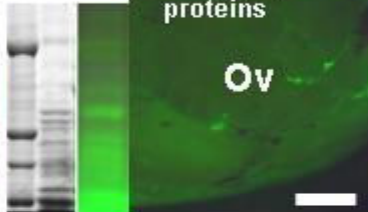**H**

FITC-labeled BSA

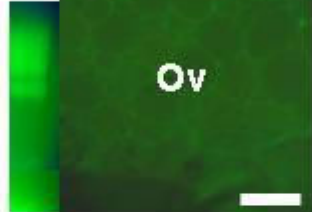

Supplement: MOESM3 [file 9568928]
